# Supplementary material for: Quantitative sustainable design (QSD) for the prioritization of research, development, and deployment of technologies: a tutorial and review
Source: Royal Society of Chemistry journal article supplement (doi:10.1039/d2ew00431c), 2022-01-01
Supplement: d2ew00431c1.pdf [file d2ew00431c1.pdf]

**Quantitative Sustainable Design (QSD) for the Prioritization of Research, Development, and Deployment of Technologies: A Tutorial and Review**

Yalin Li, John T. Trimmer, Steven Hand, Xinyi Zhang, Katherine G. Chambers, Hannah A.C. Lohman, Rui Shi, Diana M. Byrne, Sherri M. Cook, Jeremy S. Guest

| Table S1. Additional literature examples illustrating concepts, steps, and applications of QSD. |                                                                                                                                                                                                                                                                                                                                                                                                                       |                                                                                                                                                                                                                                                                                                              |                                                                                                                                                                                                                                                                                                                                                                                                                                                                                              |                                                                                                                                                                                                                                              |
|-------------------------------------------------------------------------------------------------|-----------------------------------------------------------------------------------------------------------------------------------------------------------------------------------------------------------------------------------------------------------------------------------------------------------------------------------------------------------------------------------------------------------------------|--------------------------------------------------------------------------------------------------------------------------------------------------------------------------------------------------------------------------------------------------------------------------------------------------------------|----------------------------------------------------------------------------------------------------------------------------------------------------------------------------------------------------------------------------------------------------------------------------------------------------------------------------------------------------------------------------------------------------------------------------------------------------------------------------------------------|----------------------------------------------------------------------------------------------------------------------------------------------------------------------------------------------------------------------------------------------|
|                                                                                                 | Example 1                                                                                                                                                                                                                                                                                                                                                                                                             | Example 2                                                                                                                                                                                                                                                                                                    | Example 3                                                                                                                                                                                                                                                                                                                                                                                                                                                                                    | Example 4                                                                                                                                                                                                                                    |
| Title                                                                                           | A Unified Modeling Framework to Advance Biofuel Production from Microalgae [1]                                                                                                                                                                                                                                                                                                                                        | Health and Climate Impacts from Long-Haul Truck Electrification [2]                                                                                                                                                                                                                                          | Life Cycle Assessment of The End-of-Life Phase of a Residential Building [3]                                                                                                                                                                                                                                                                                                                                                                                                                 | Prioritization of Bioethanol Production Pathways in China Based on Life Cycle Sustainability Assessment and Multicriteria Decision-Making [4]                                                                                                |
| QSD objectives                                                                                  | Inform potential research and development priorities; Provide recommendations for different microalgae processing technologies to leverage specific biomass components to improve the economic viability of the overall system                                                                                                                                                                                        | Account for the climate and health impacts of a potential large-scale transition to truck electrification                                                                                                                                                                                                    | Assess the environmental performance of the overall end-of-life stage of a specific residential building, particularly focusing on the management of the generated demolition waste                                                                                                                                                                                                                                                                                                          | Determine the most sustainable scenario for bioethanol production for a particular region                                                                                                                                                    |
| <b>Step 1. Define Problem Space</b>                                                             |                                                                                                                                                                                                                                                                                                                                                                                                                       |                                                                                                                                                                                                                                                                                                              |                                                                                                                                                                                                                                                                                                                                                                                                                                                                                              |                                                                                                                                                                                                                                              |
| System boundary                                                                                 | Microalgae cultivation and downstream biorefinery conversion                                                                                                                                                                                                                                                                                                                                                          | Truck manufacturing and freight transportation                                                                                                                                                                                                                                                               | Building deconstruction/demolition, waste collection, pre-sorting, transportation, recycling, and disposal                                                                                                                                                                                                                                                                                                                                                                                   | Crop production, bioethanol production, and transportation (crop to biorefinery and biorefinery to market)                                                                                                                                   |
| Life cycle stages                                                                               | Construction, operations, maintenance                                                                                                                                                                                                                                                                                                                                                                                 | Construction, operations, maintenance                                                                                                                                                                                                                                                                        | End-of-life                                                                                                                                                                                                                                                                                                                                                                                                                                                                                  | Not reported                                                                                                                                                                                                                                 |
| Decision variables*                                                                             | Microalgae species; microalgae cultivation retention time; downstream conversion technologies                                                                                                                                                                                                                                                                                                                         | Truck type; grid scenario                                                                                                                                                                                                                                                                                    | Demolition (selective vs. non-selective) and waste management (recycle all valuable materials vs. all but inert vs. only recycle steel and copper) methods                                                                                                                                                                                                                                                                                                                                   | Crop type for bioethanol production                                                                                                                                                                                                          |
| Technological parameters*                                                                       | Subset of stoichiometric (e.g., maximum achievable ratio of stored carbohydrates to functional cells) and kinetic (e.g., specific maintenance rate) parameters for microalgae growth; Natural gas consumption for in-house hydrogen production                                                                                                                                                                        | Battery specific energy, capacity, and charging power; truck energy efficiency, charging power, refueling time, payload                                                                                                                                                                                      | Material (glass, copper, steel, plastics, and combustibles) recovery and generated waste during sorting                                                                                                                                                                                                                                                                                                                                                                                      | Not included                                                                                                                                                                                                                                 |
| Contextual parameters*                                                                          | Capital cost index; equipment costs; unit costs of chemicals and utilities                                                                                                                                                                                                                                                                                                                                            | Electricity mix for the contiguous United States; marginal damages for local air pollutants                                                                                                                                                                                                                  | Climate conditions (wind, rain, moisture)                                                                                                                                                                                                                                                                                                                                                                                                                                                    | Not included                                                                                                                                                                                                                                 |
| <b>Step 2. Establish Simulation Algorithms</b>                                                  |                                                                                                                                                                                                                                                                                                                                                                                                                       |                                                                                                                                                                                                                                                                                                              |                                                                                                                                                                                                                                                                                                                                                                                                                                                                                              |                                                                                                                                                                                                                                              |
| Algorithm types and levels of complexity*                                                       | <b>Theoretical values:</b> theoretical methane yield in anaerobic digestion for chemicals with no data in literature<br><b>Existing design &amp; data:</b> product yields from fermentation, catalytic hydrothermal gasification, and hydrotreating<br><b>Design heuristics; empirical models:</b> reactor design; product yields from hydrothermal liquefaction<br><b>Mechanistic models:</b> microalgae cultivation | <b>Theoretical values:</b> CO <sub>2</sub> /SO <sub>2</sub> emissions (from mass balance)<br><b>Existing design &amp; data:</b> freight demand from highway assignment database<br><b>Design heuristics; empirical models:</b> truck dispatch model<br><b>Mechanistic models:</b> vehicle energy consumption | <b>Existing design &amp; data:</b> use material flow analysis with site visit and literature data to quantify waste based on the bill of quantity for the building materials<br><b>Design heuristics; empirical models:</b> calculation of the amount of dust generated during various demolition activities (mechanical dismemberment, debris loading, onsite lorry traffic and bulldozer pushing)<br><b>Mechanistic models:</b> calculation of the amount of needed sand during demolition | <b>Existing design &amp; data:</b> values for economic and environmental indicators (from literature)                                                                                                                                        |
| <b>Step 3. Characterize System Sustainability</b>                                               |                                                                                                                                                                                                                                                                                                                                                                                                                       |                                                                                                                                                                                                                                                                                                              |                                                                                                                                                                                                                                                                                                                                                                                                                                                                                              |                                                                                                                                                                                                                                              |
| Sustainability dimensions                                                                       | Economic                                                                                                                                                                                                                                                                                                                                                                                                              | Environmental; human health                                                                                                                                                                                                                                                                                  | Environmental                                                                                                                                                                                                                                                                                                                                                                                                                                                                                | Economic; environmental; social                                                                                                                                                                                                              |
| Characterization techniques                                                                     | Techno-economic analysis                                                                                                                                                                                                                                                                                                                                                                                              | Life cycle assessment; monetization of human health damages                                                                                                                                                                                                                                                  | Life cycle assessment                                                                                                                                                                                                                                                                                                                                                                                                                                                                        | Life cycle costing; life cycle assessment; stakeholder survey                                                                                                                                                                                |
| Sustainability indicators                                                                       | Minimum biomass/diesel/fuel selling price                                                                                                                                                                                                                                                                                                                                                                             | Monetized climate and human health (primary and secondary fine particulate matter from NO <sub>x</sub> , SO <sub>2</sub> , and NH <sub>3</sub> ) damages                                                                                                                                                     | Carcinogens, non-carcinogens, respiratory inorganics, respiratory organics, ionizing radiation, ozone layer depletion, aquatic ecotoxicity, terrestrial ecotoxicity, terrestrial acidification/nutritification, aquatic acidification, aquatic eutrophication, land occupation, global warming, non-renewable energy, and mineral extraction                                                                                                                                                 | <b>Economic:</b> production cost<br><b>Environmental:</b> climate change, human toxicity, terrestrial acidification, and particulate matter formation<br><b>Social:</b> social benefits, contribution to economic development, food security |
| <b>Execution and Applications</b>                                                               |                                                                                                                                                                                                                                                                                                                                                                                                                       |                                                                                                                                                                                                                                                                                                              |                                                                                                                                                                                                                                                                                                                                                                                                                                                                                              |                                                                                                                                                                                                                                              |
| Execution tools*                                                                                | MATLAB; Microsoft Excel                                                                                                                                                                                                                                                                                                                                                                                               | GREET                                                                                                                                                                                                                                                                                                        | SimaPro                                                                                                                                                                                                                                                                                                                                                                                                                                                                                      | Not reported                                                                                                                                                                                                                                 |
| Analyses*                                                                                       | <b>Uncertainty analyses:</b> Figures 3, S1-S5<br><b>Sensitivity analyses:</b> Figures S6, S7<br><b>Scenario analyses:</b> Figures 3, S3-S5                                                                                                                                                                                                                                                                            | <b>Scenario analyses:</b> Figure 3                                                                                                                                                                                                                                                                           | <b>Scenario analyses:</b> Figures 7-10                                                                                                                                                                                                                                                                                                                                                                                                                                                       | <b>Scenario analyses:</b> Tables 3, 4, 6                                                                                                                                                                                                     |

\*Non-exhaustive list in the example paper.

**References**

- [1] Leow et al., *Environ. Sci. Technol.* **2018**, *52* (22), 13591–13599  
 [2] Tong et al., *Environ. Sci. Technol.* **2021**, *55* (13), 8514–8523  
 [3] Vitale et al., *Waste Management* **2017**, *60*, 311–321  
 [4] Ren et al., *Int J Life Cycle Assess.* **2015**, *20* (6), 842–853
